# Supplementary material for: Case 39-2005
Source: Atypon-hosted journal article supplement (doi:10.1056/nejmcpc059036), 2005-12-21
Supplement: nejm_ryan_2697sa1.pdf [file nejm_ryan_2697sa1.pdf]

## Supplementary Appendix

This appendix has been provided by the authors to give readers additional information about their work.

Supplement to: Ryan ET, Felsenstein D, Aquino SL, Branda JA, Morgan JG. Case 39-2005: a 63-year-old woman with a positive serologic test for syphilis and persistent eosinophilia. *N Engl J Med* 2005;353:2697-705.

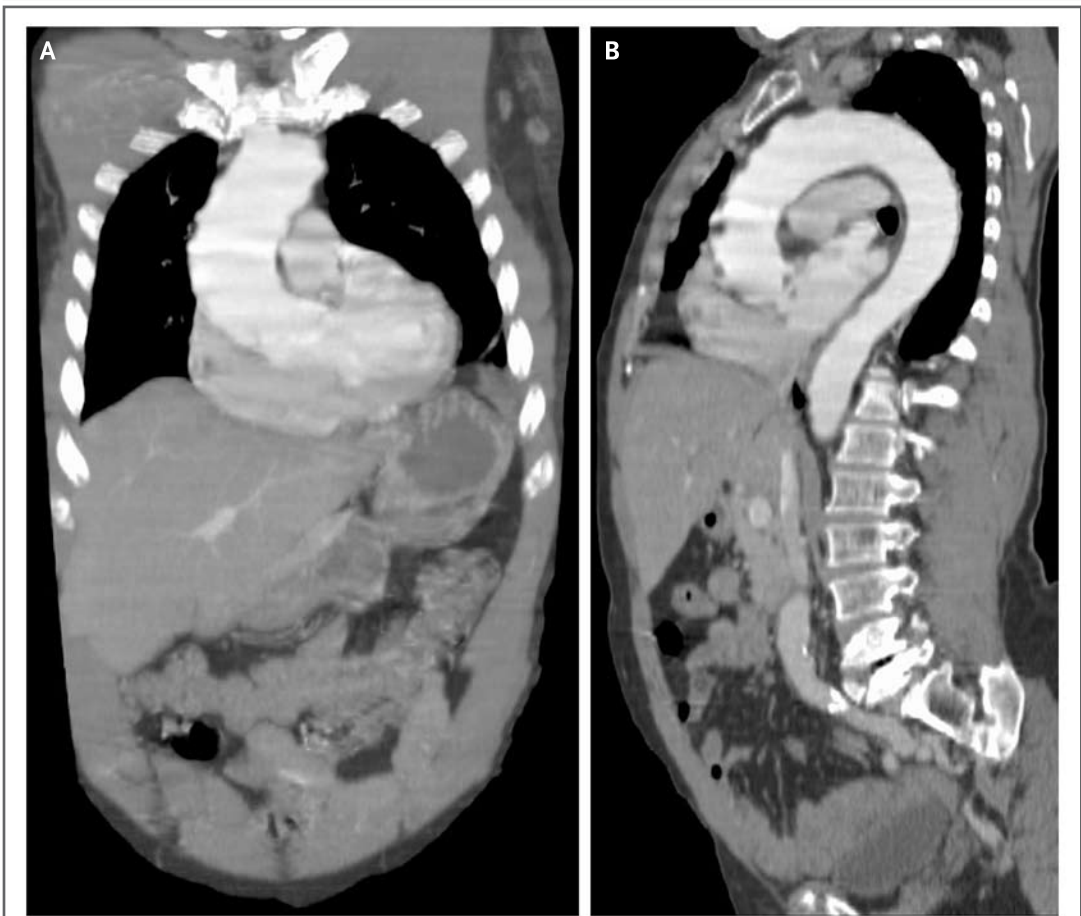

**Figure 1.** Multiplanar Coronal (Panel A) and Sagittal (Panel B) Reconstruction of CT Images Shows Diffuse Dilatation of the Ascending Aorta with No Focal Aneurysms.
